# Supplementary material for: Preparation of Nanocomposites for Antibacterial Orthodontic Invisible Appliance Based on Piezoelectric Catalysis
Source: MDPI journal article supplement (doi:10.3390/s23115336), 2023-06-05
Supplement: s1 [file s1]

## Supporting Information

### Preparation of Nanocomposites for Antibacterial Orthodontic Invisible Appliance Based on Piezoelectric Catalysis

#### S1. Particle size distribution

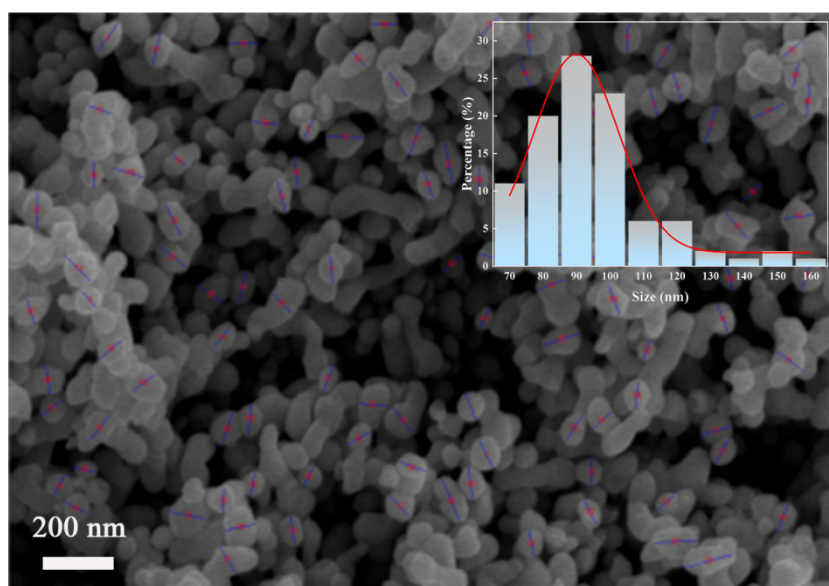

**Figure S1** SEM images of BaTiO<sub>3</sub>NPs and the inset shows the particle size distribution of BaTiO<sub>3</sub>NPs

#### S2. X-ray diffraction and Raman spectra

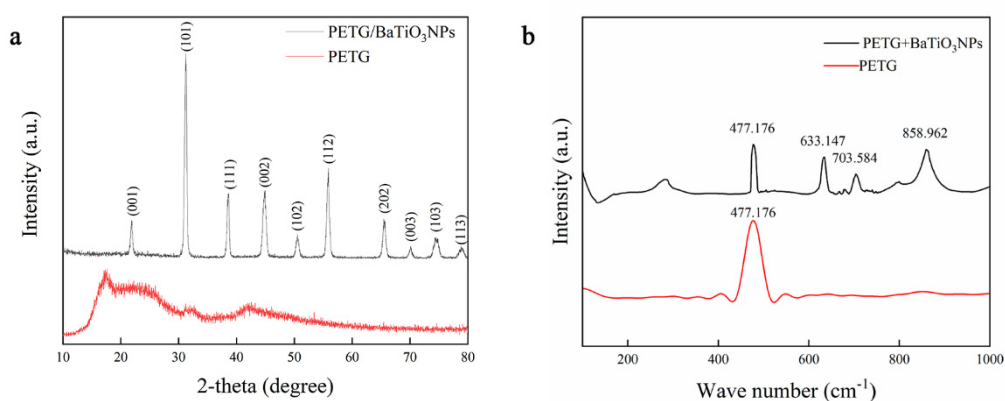

**Figure S2** (a) X-ray diffraction images of PETG and PETG/BaTiO<sub>3</sub>NPs (30 wt%) composites; (b) Raman spectra of PETG and PETG/BaTiO<sub>3</sub>NPs (30 wt%) composites.

### S3. Antibacterial test

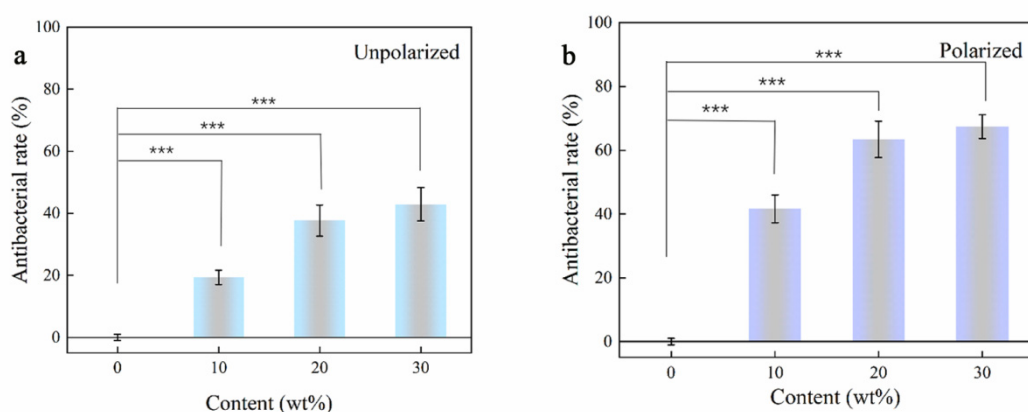

**Figure S3** (a) Antibacterial rates against *S. mutans* of the unpolarized PETG/BaTiO<sub>3</sub>NPs (0 wt%, 10 wt%, 20 wt%, 30 wt%); (b) Antibacterial rates against *S. mutans* of the polarized PETG/BaTiO<sub>3</sub>NPs (0 wt%, 10 wt%, 20 wt%, 30 wt%) (\*\*\*)  $P < 0.001$

### S4. Mechanical properties

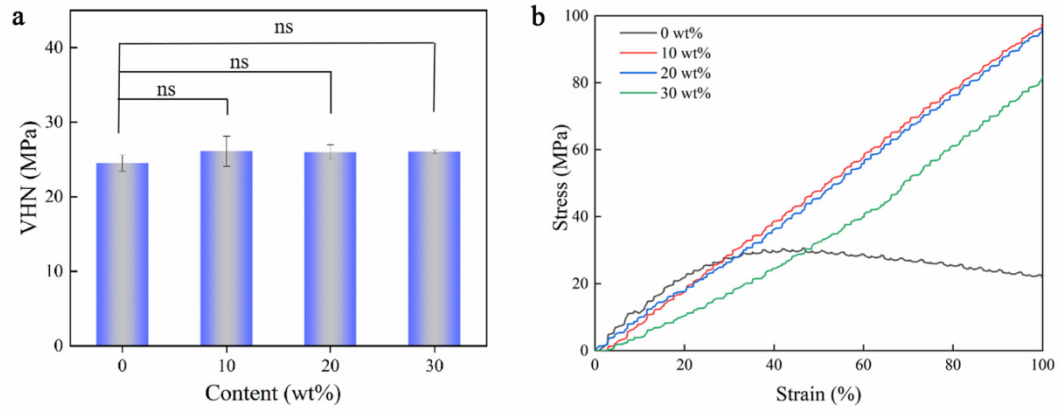

**Figure S4** (a) microhardness of PETG/BaTiO<sub>3</sub>NPs(0 wt%, 10 wt%, 20 wt%, 30wt%); (b) Stress-strain curves of PETG/BaTiO<sub>3</sub>NPs(0 wt%, 10 wt%, 20 wt%, 30wt%) (ns=no significance)
